# Supplementary material
Source: PubMed Central journal article supplement (PMC6631346)
Supplement: NIHMS1525421-supplement-1.pdf [file NIHMS1525421-supplement-1.pdf]

## Supplementary Information

### Supplementary Figure 1. Uncropped scans of source data immunoblots.

**Supplementary Videos 1 and 2. Three-dimensional imaging of LDL uptake in the ascending aorta in mice with versus without SR-B1 in endothelium, related to Figure 2.** Male apoE<sup>-/-</sup>;SR-B1<sup>fl/fl</sup> (Video 1) and apoE<sup>-/-</sup>;SR-B1<sup>ΔEC</sup> (Video 2) mice previously placed on an atherogenic diet for one week received an IV injection of Dil-oxLDL, and 4 hours later the aortas were perfused, isolated and immediately subjected to Hoechst staining and confocal fluorescence microscopy on a randomly-selected region on the luminal surface of the ascending aorta to a depth of 50um. Dil is shown in red and Hoechst staining of nuclei is shown in blue. At the start of the representative videos shown, the lumen is on the left side.
